# Supplementary material for: Prognostic significance of CD8+ tumor-infiltrating lymphocytes and CD66b+ tumor-associated neutrophils in the invasive margins of stages I–III colorectal cancer
Source: PubMed Central journal article supplement — Oncol Lett. 2022 May 17;24(1):212. doi: 10.3892/ol.2022.13333 (PMC9178703; doi:10.3892/ol.2022.13333), 2022-05-17

Figure S1. Combined assessment of CD8<sup>+</sup> TILs and CD66b<sup>+</sup> TANs densities (Model 2) in the invasive margin. Kaplan-Meier analysis of OS and DFS designed according to TANs-to-TILs ratio high/low. TILs, tumor-infiltrating lymphocytes; TANs, tumor-associated neutrophils; OS, overall survival; DFS, disease-free survival.

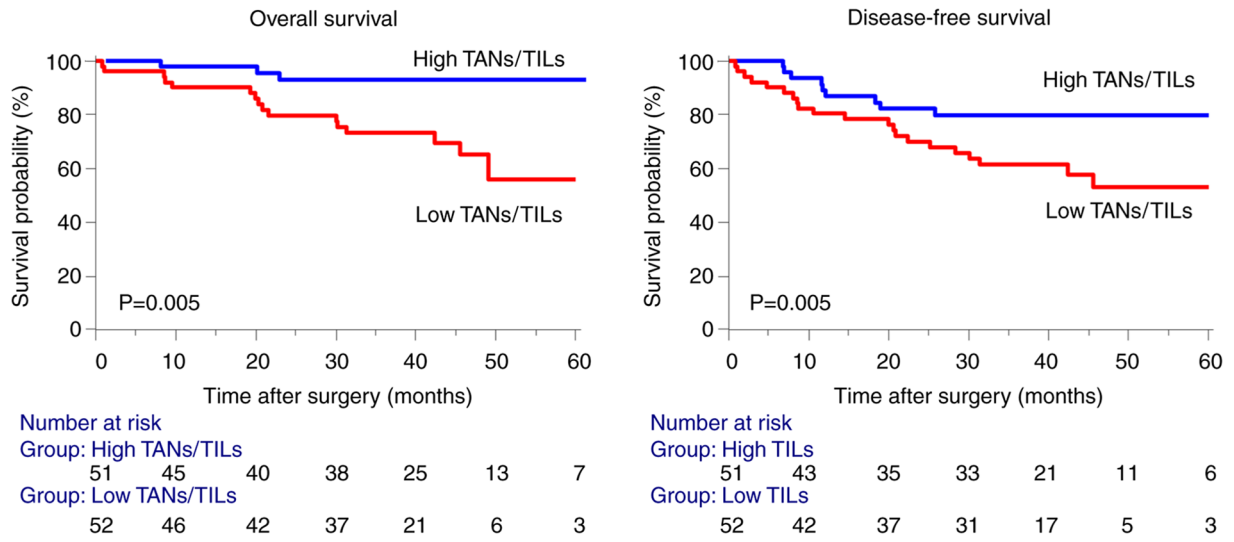

Supplement: Supplementary_Data1.pdf [file Supplementary_Data1.pdf]
