# Supplementary material for: Prognostic significance of CD8+ tumor-infiltrating lymphocytes and CD66b+ tumor-associated neutrophils in the invasive margins of stages I–III colorectal cancer
Source: PubMed Central journal article supplement — Oncol Lett. 2022 May 17;24(1):212. doi: 10.3892/ol.2022.13333 (PMC9178703; doi:10.3892/ol.2022.13333), 2022-05-17
Supplement: Supplementary_Data2.pdf [file Supplementary_Data2.pdf]

Table SI. Multivariate analysis for OS of patients with stages I-III CRC.

| Variables                             | Univariate |           |                    | Multivariate |           |                    |
|---------------------------------------|------------|-----------|--------------------|--------------|-----------|--------------------|
|                                       | HR         | 95%CI     | P-value            | HR           | 95%CI     | P-value            |
| Gender (Male)                         | 1.39       | 0.55-3.95 | 0.49               |              |           |                    |
| Age ( $\geq 71$ years) <sup>a</sup>   | 1.77       | 0.71-4.99 | 0.23               |              |           |                    |
| Location (Rectum)                     | 1.09       | 0.44-2.65 | 0.84               |              |           |                    |
| Differentiation<br>(Undifferentiated) | 4.22       | 1.20-11.7 | 0.03               | 2.63         | 0.73-7.54 | 0.81               |
| Pathological<br>category(T3/T4) T     | 1.84       | 0.74-5.20 | 0.19               | 1.96         | 0.76-5.65 | 0.17               |
| Vessel invasion (Present)             | 1.21       | 0.49-3.22 | 0.69               |              |           |                    |
| Lymph node metastasis<br>(Present)    | 1.48       | 0.40-3.59 | 0.40               |              |           |                    |
| MSI (MSI-L/MSS)                       | 1.49       | 0.31-26.8 | 0.68               |              |           |                    |
| KRAS (Wild)                           | 1.73       | 0.71-4.63 | 0.23               |              |           |                    |
| BRAF (Wild)                           | 1.11       | 0.23-19.9 | 0.92               |              |           |                    |
| TANs/TILs(Low) <sup>b</sup>           | 4.22       | 1.54-14.8 | 0.004 <sup>c</sup> | 4.02         | 1.42-14.4 | 0.008 <sup>c</sup> |

<sup>a</sup>The median age at surgery was 71 years in this cohort; <sup>b</sup>The cutoff value determined according to the median value; <sup>c</sup>P<0.05. CRC, colorectal cancer; OS, overall survival; HR, hazard ratio; CI, confidence interval.

Table SII. Multivariate analysis of DFS of patients with stage I-III CRC.

| Variables                           | Univariate |           |                   | Multivariate |           |         |
|-------------------------------------|------------|-----------|-------------------|--------------|-----------|---------|
|                                     | HR         | 95%CI     | P-value           | HR           | 95%CI     | P-value |
| Gender (Male)                       | 1.54       | 0.73-3.53 | 0.26              |              |           |         |
| Age ( $\geq 71$ years) <sup>a</sup> | 0.83       | 0.41-1.70 | 0.60              |              |           |         |
| Location (Rectum)                   | 1.00       | 0.48-2.04 | 0.99              |              |           |         |
| Differentiation(Undifferentiated)   | 2.17       | 0.64-5.57 | 0.19              | 1.58         | 0.45-4.29 | 0.44    |
| Pathological T category(T3/T4)      | 2.48       | 1.15-5.92 | 0.02 <sup>c</sup> | 2.07         | 0.90-5.23 | 0.09    |
| Vessel invasion (Present)           | 1.64       | 0.78-3.78 | 0.19              | 1.32         | 0.57-3.26 | 0.52    |
| Lymph node metastasis (Present)     | 2.18       | 1.06-4.44 | 0.04 <sup>c</sup> | 1.39         | 0.62-3.14 | 0.42    |
| MSI (MSI-L/MSS)                     | 2.51       | 0.54-44.6 | 0.29              |              |           |         |
| KRAS (Wild)                         | 1.19       | 0.59-2.46 | 0.63              |              |           |         |
| BRAF (Wild)                         | 2.02       | 0.43-36.0 | 0.44              |              |           |         |
| TANs/TILs(Low) <sup>b</sup>         | 2.13       | 1.03-4.72 | 0.04 <sup>c</sup> | 2.03         | 0.94-4.62 | 0.07    |

<sup>a</sup>The median age at surgery was 71 years in this cohort; <sup>b</sup>The cutoff value was determined according to the median value; <sup>c</sup>P<0.05. CRC, colorectal cancer; DFS, disease-free survival; HR, hazard ratio; CI, confidence interval.
